# Supplementary material for: 6051 農村地域における喫茶店の利用実態(商店街・商業施設利用,農村計画,2013 年度日本建築学会大会(北海道)学術講演会・建築デザイン発表会)
Source: Royal Society of Chemistry journal article supplement (doi:10.1039/d0dt03410j), 2013-08-30
Supplement: d0dt03410j1.pdf [file d0dt03410j1.pdf]

## Supporting Information

### **Engineering Ligand conformation by substituent manipulation towards various copper-tricarboxylate frameworks with tuned gas adsorption properties**

Tingting Xu<sup>#</sup>, Minghui He<sup>#</sup>, Lihui Fan, Ping Zhou, Zhenzhen Jiang, and Yabing He\*

Key Laboratory of the Ministry of Education for Advanced Catalysis Materials,  
College of Chemistry and Life Sciences, Zhejiang Normal University, Jinhua 321004,  
China. E-mail: [heyabing@zjnu.cn](mailto:heyabing@zjnu.cn)

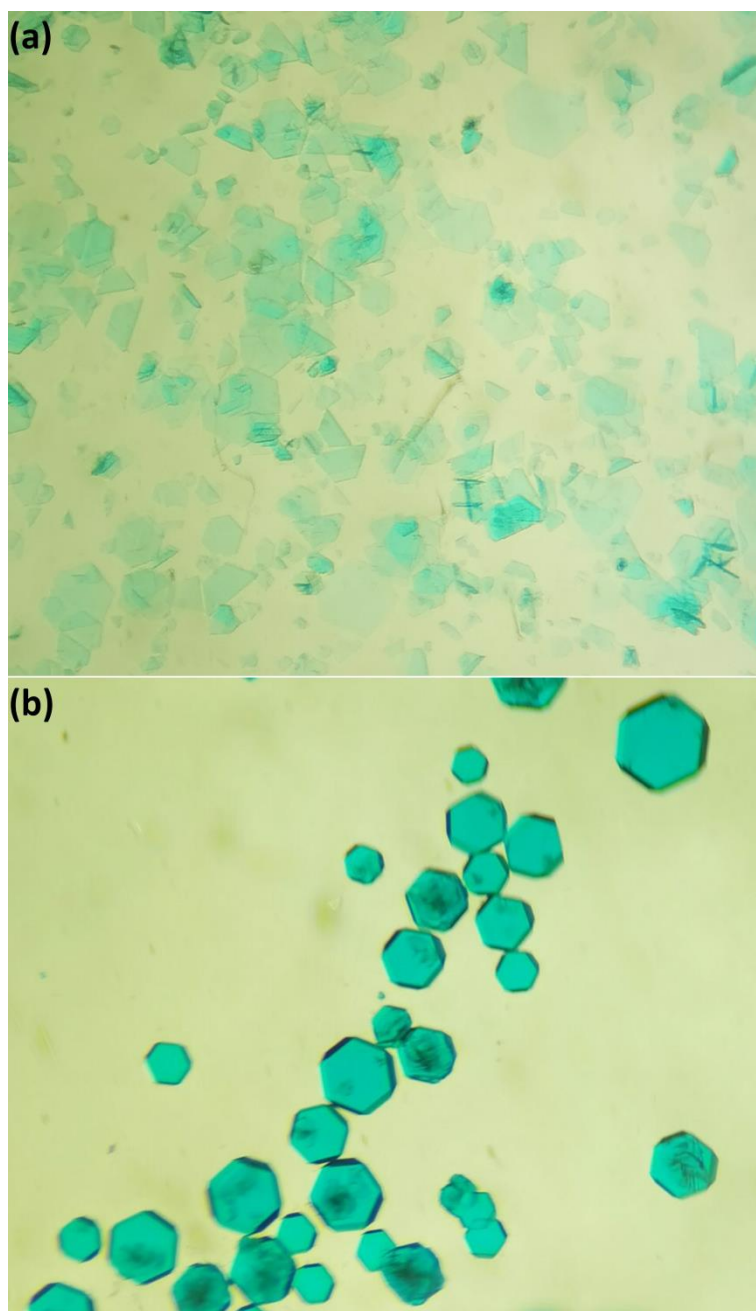

**Fig. S1** Electronic photographs of the as-synthesized (a) **ZJNU-109**, and (c) **ZJNU-110**.

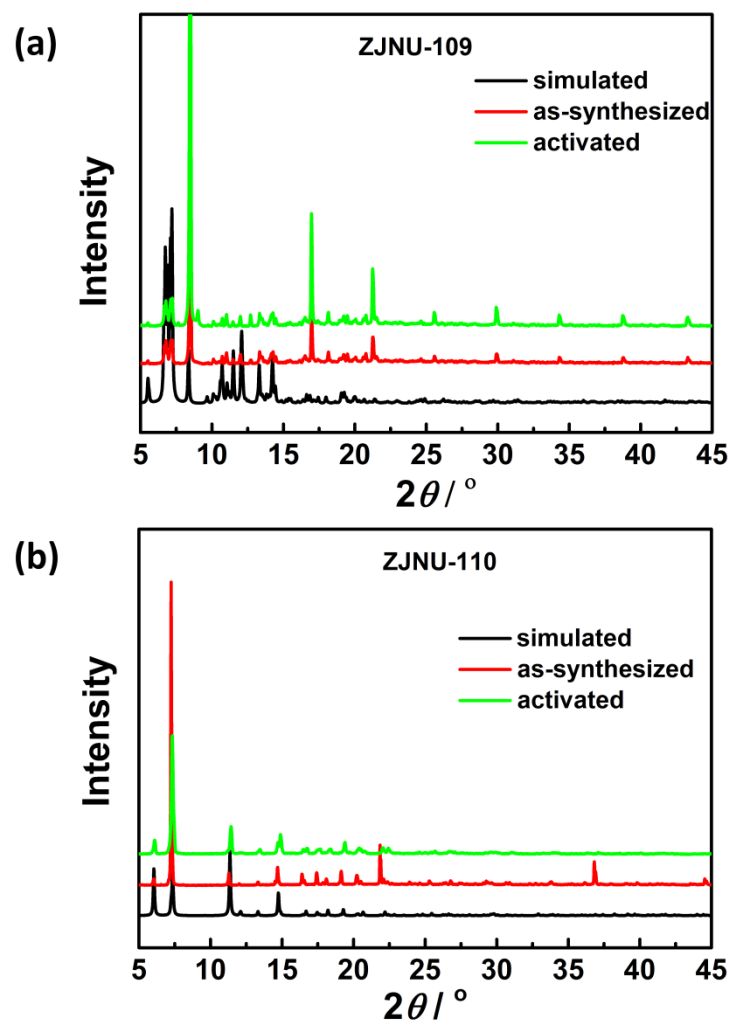

**Fig. S2** Experimental and simulated PXRD patterns of (a) **ZJNU-109**, and (b) **ZJNU-110**.

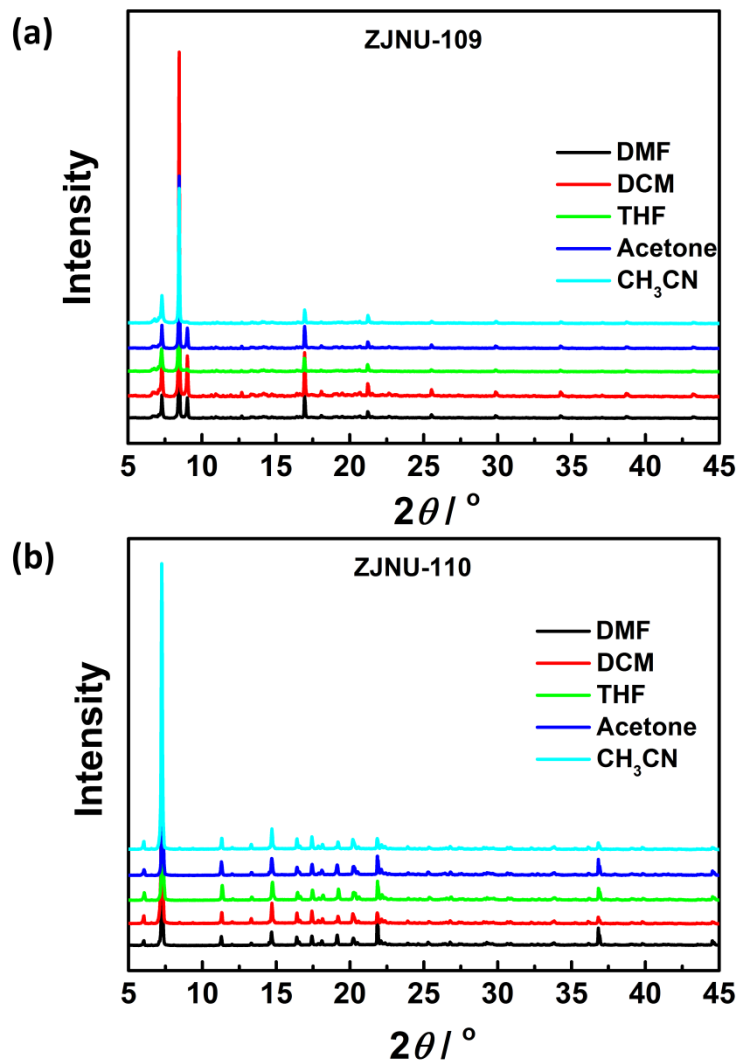

**Fig. S3** PXRD patterns for the as-synthesized (a) ZJNU-109 and (b) ZJNU-110 immersed in different organic solvents for 24 h at room temperature.

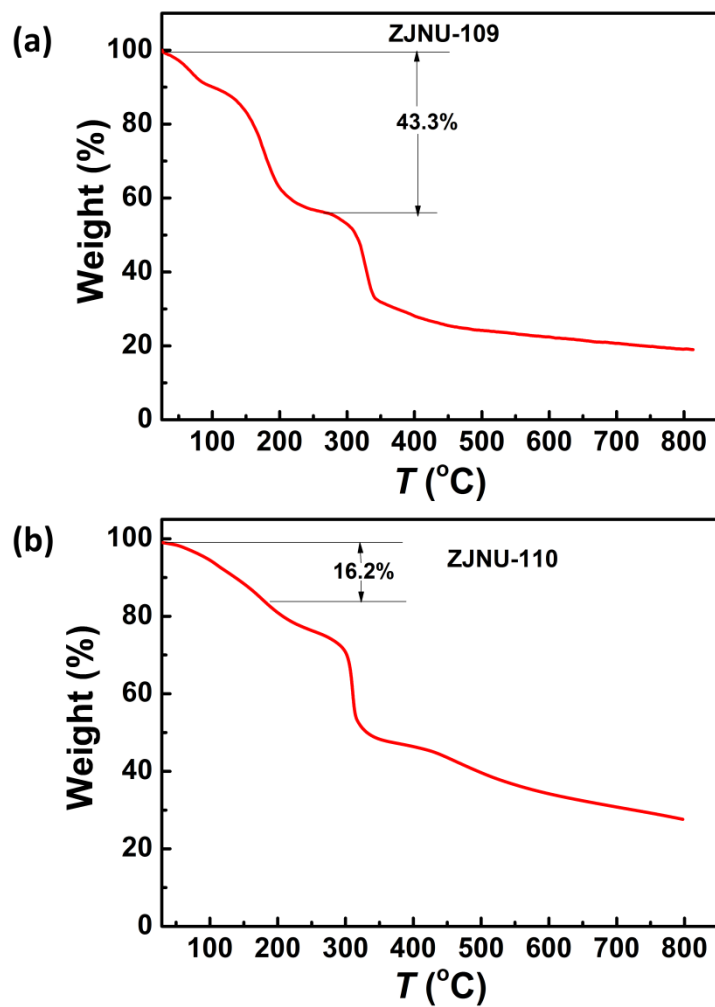

**Fig. S4** TGA curves of the as-synthesized (a) **ZJNU-109**, and (b) **ZJNU-110** under N<sub>2</sub> atmosphere with a heating rate of 5 K min<sup>-1</sup>.

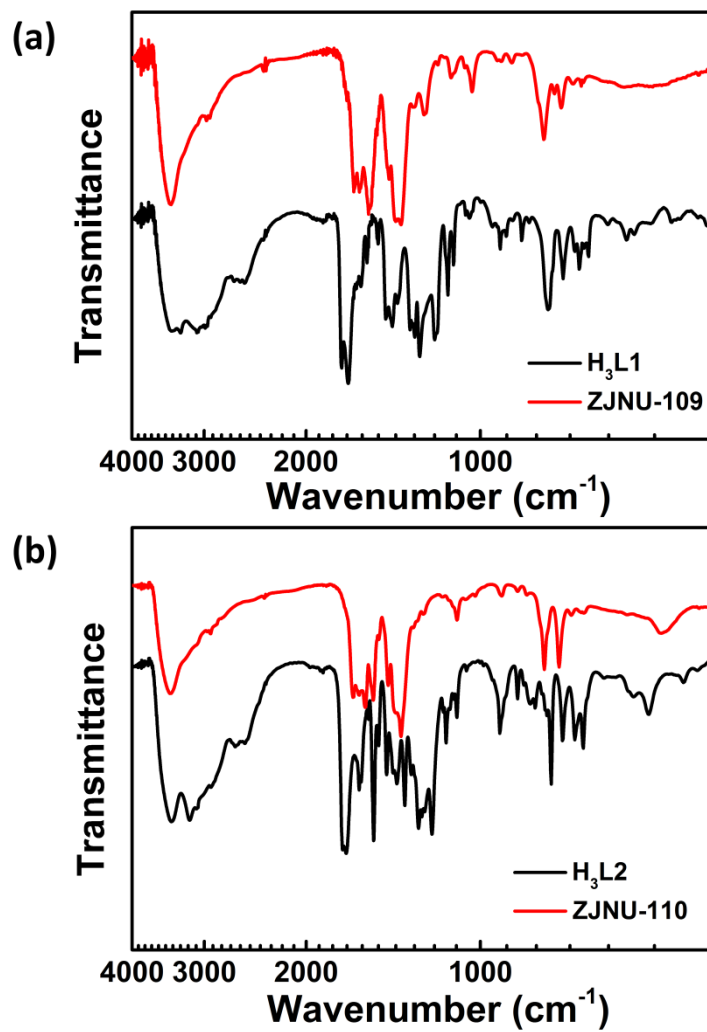

**Fig. S5** Comparisons of FTIR spectra of (a) **ZJNU-109** and its ligand H<sub>3</sub>L1, and (b) **ZJNU-110** and its ligand H<sub>3</sub>L2.

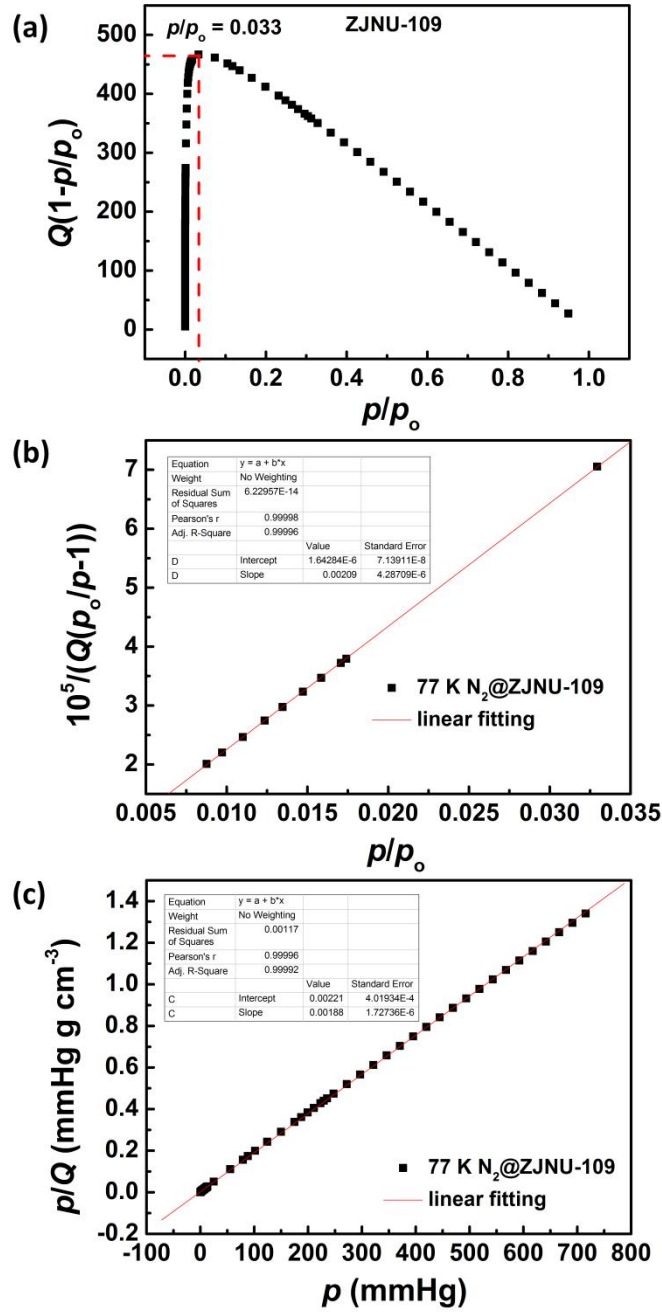

$$S_{\text{BET}} = 1/(1.64284 \times 10^{-6} + 0.00209)/22414 \times 6.023 \times 10^{23} \times 0.162 \times 10^{-18} = 2081 \text{ m}^2 \text{ g}^{-1}$$

$$S_{\text{Langmuir}} = (1/0.00188)/22414 \times 6.023 \times 10^{23} \times 0.162 \times 10^{-18} = 2316 \text{ m}^2 \text{ g}^{-1}$$

$$\text{BET constant } C = 1 + 0.00209/1.64284 \times 10^{-6} = 1273$$

$$(p/p_o)_{n_m} = \frac{1}{\sqrt{C+1}} = 0.02726$$

**Fig. S6** The consistency plot (a), BET surface area plot (b), and Langmuir surface area plot (c) for ZJNU-109.

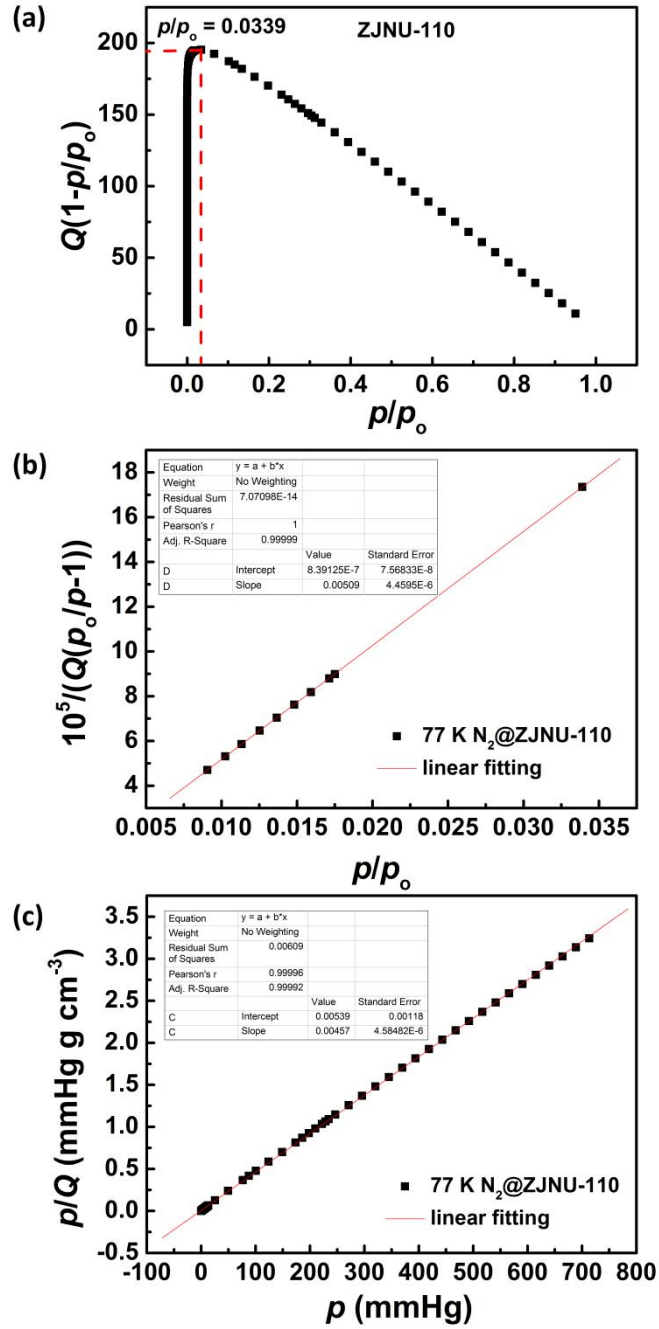

$$S_{\text{BET}} = 1/(8.39125 \times 10^{-7} + 0.00509)/22414 \times 6.023 \times 10^{23} \times 0.162 \times 10^{-18} = 855 \text{ m}^2 \text{ g}^{-1}$$

$$S_{\text{Langmuir}} = (1/0.00457)/22414 \times 6.023 \times 10^{23} \times 0.162 \times 10^{-18} = 953 \text{ m}^2 \text{ g}^{-1}$$

$$\text{BET constant } C = 1 + 0.00509/8.39125 \times 10^{-7} = 6067$$

$$(p/p_o)_{n_m} = \frac{1}{\sqrt{C+1}} = 0.01268$$

**Fig. S7** The consistency plot (a), BET surface area plot (b), and Langmuir surface area plot (c) for ZJNU-110.



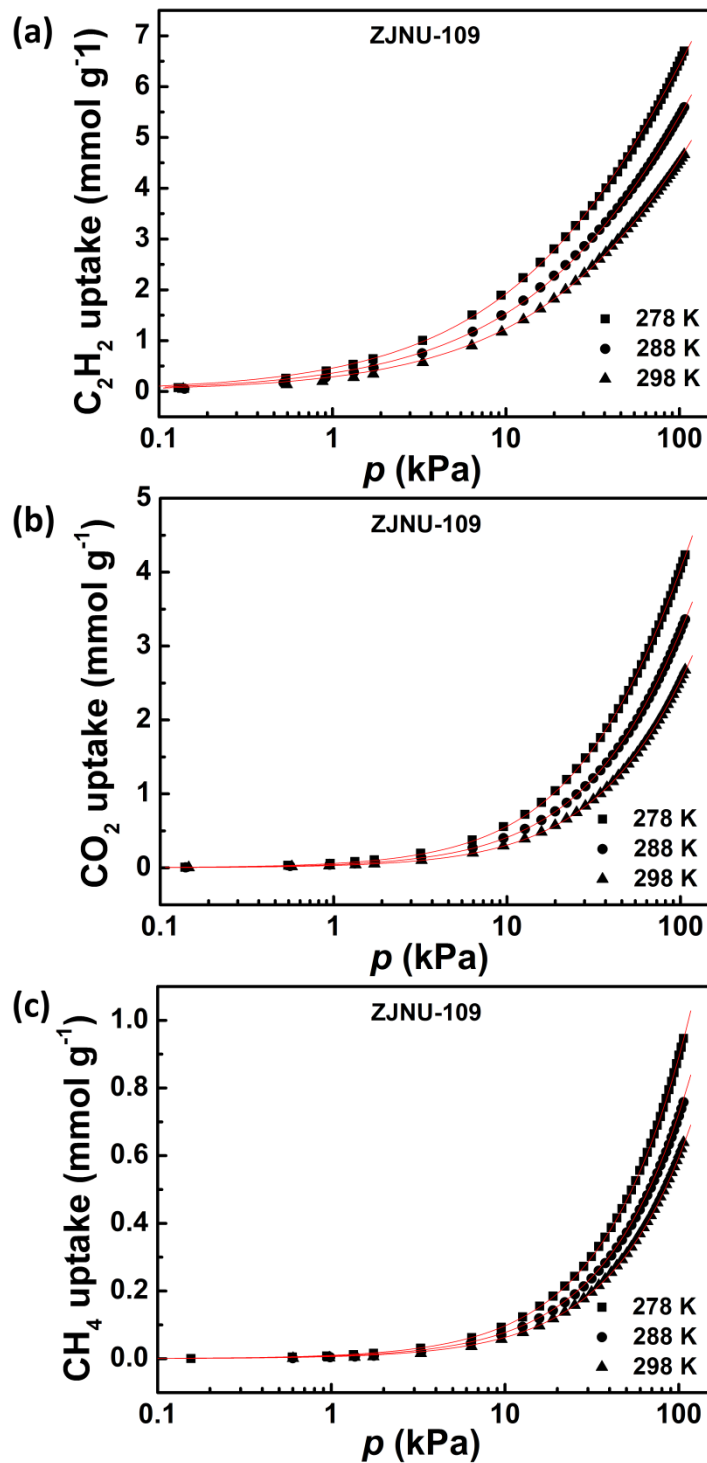

**Fig. S8** Comparison of the pure-component isotherm data for (a)  $\text{C}_2\text{H}_2$ , (b)  $\text{CO}_2$ , and (c)  $\text{CH}_4$  in **ZJNU-109** with the fitted isotherms at 278 K, 288 K, and 298 K.

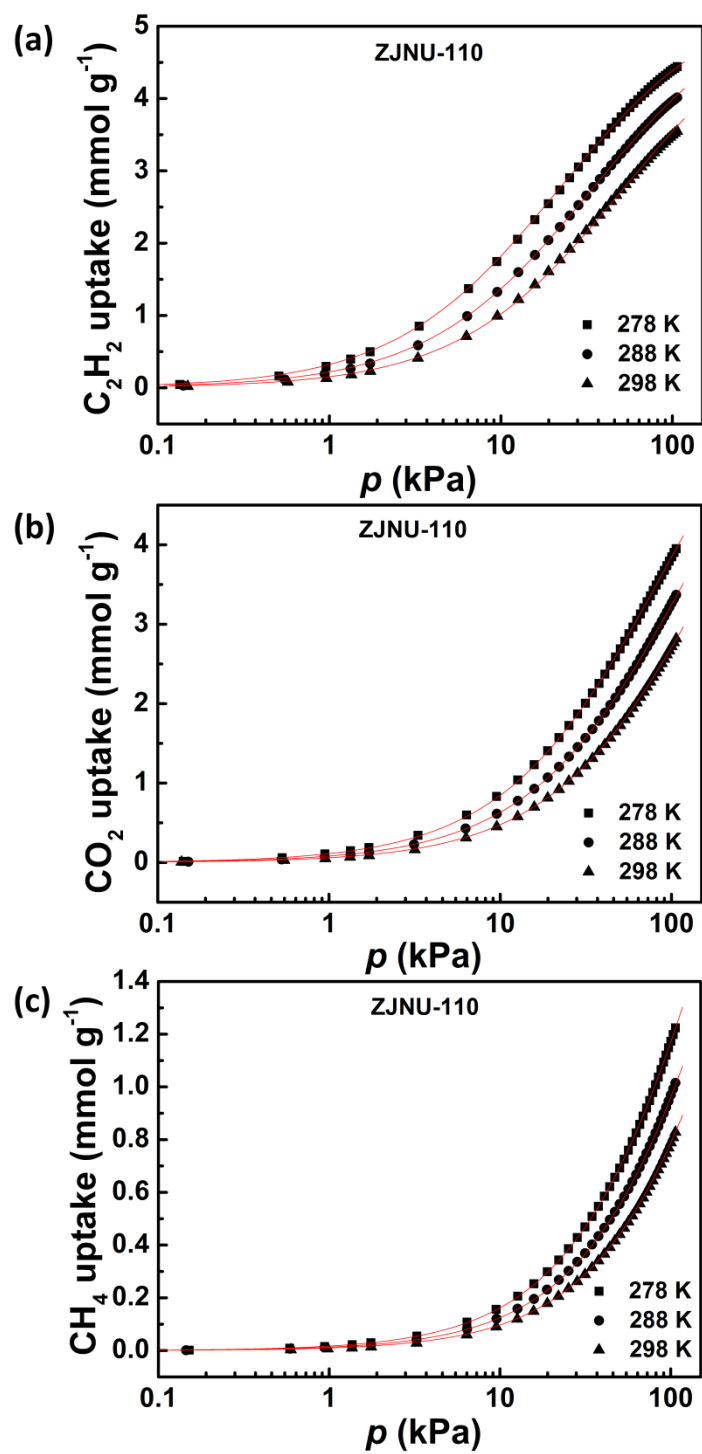

**Fig. S9** Comparison of the pure-component isotherm data for (a)  $\text{C}_2\text{H}_2$ , (b)  $\text{CO}_2$ , and (c)  $\text{CH}_4$  in **ZJNU-110** with the fitted isotherms at 278 K, 288 K, and 298 K.

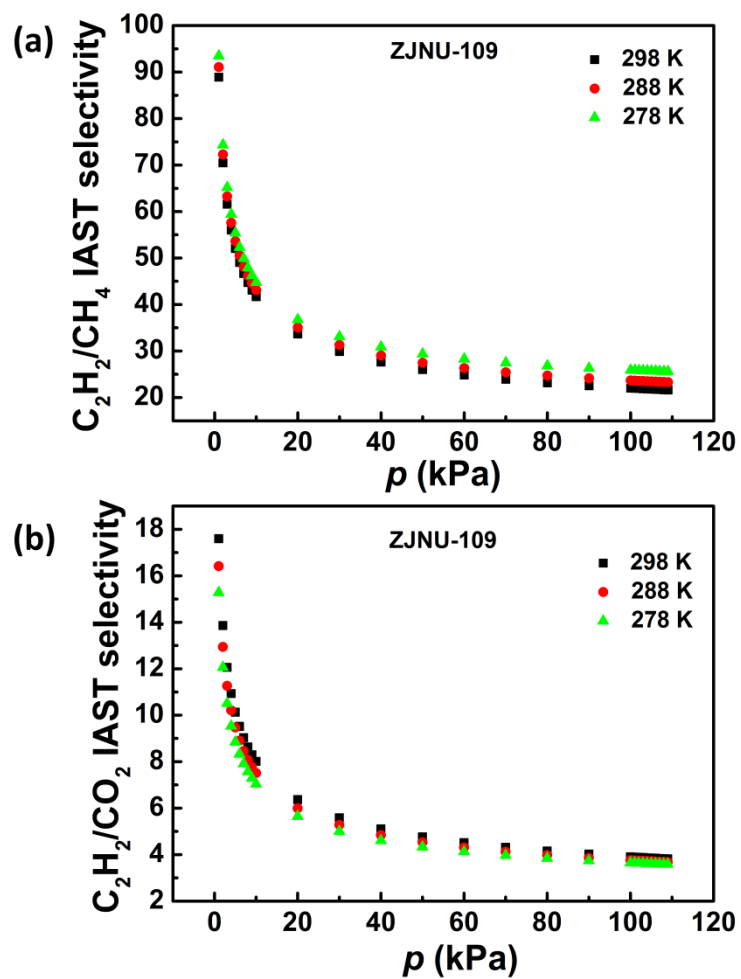

**Fig. S10** IAST selectivities for the equimolar (a)  $C_2H_2/CH_4$  and (b)  $C_2H_2/CO_2$  gas mixtures in **ZJNU-109** at three different temperatures of 278 K, 288 K, and 298 K.

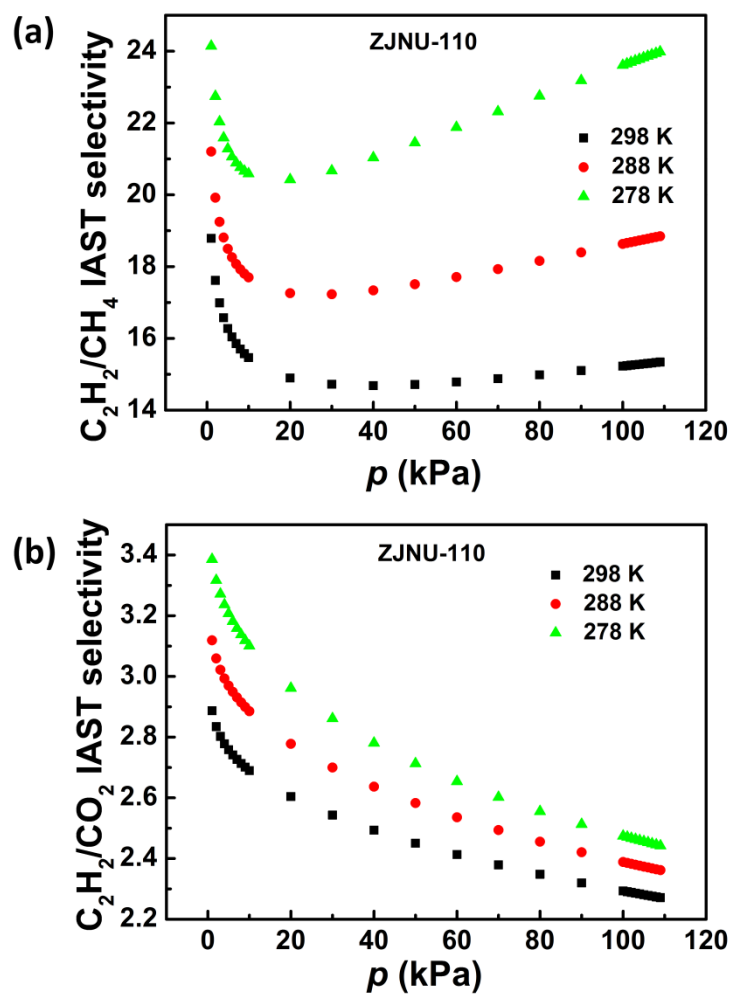

**Fig. S11** IAST selectivities for the equimolar (a)  $C_2H_2/CH_4$  and (b)  $C_2H_2/CO_2$  gas mixtures in **ZJNU-110** at three different temperatures of 278 K, 288 K, and 298 K.

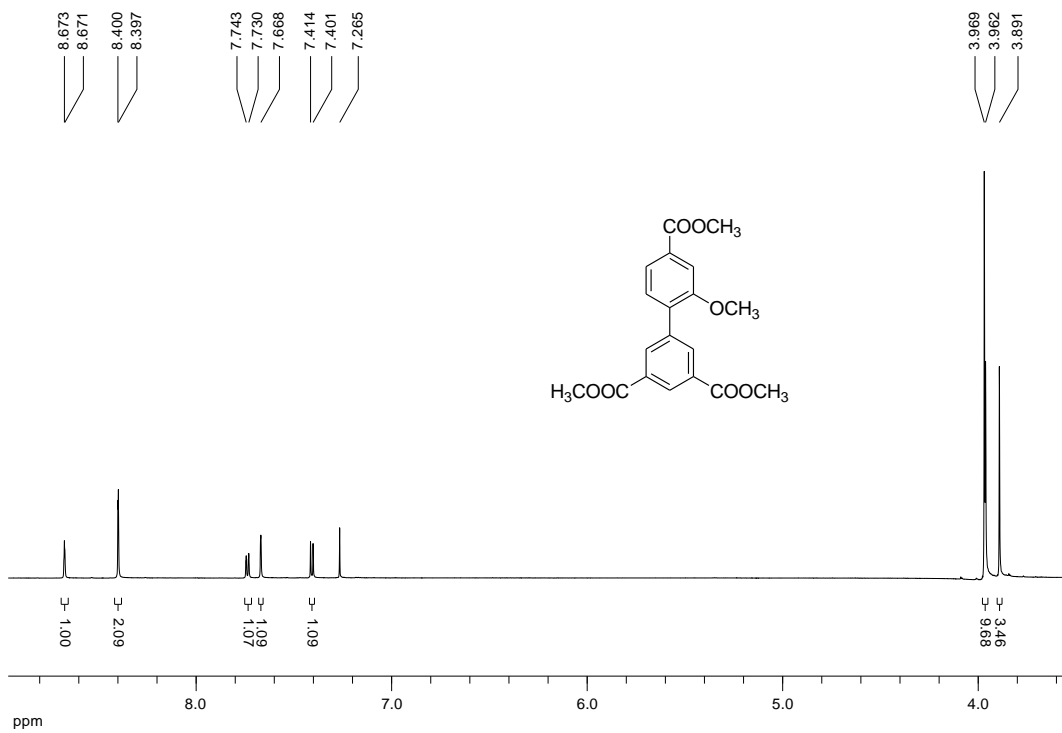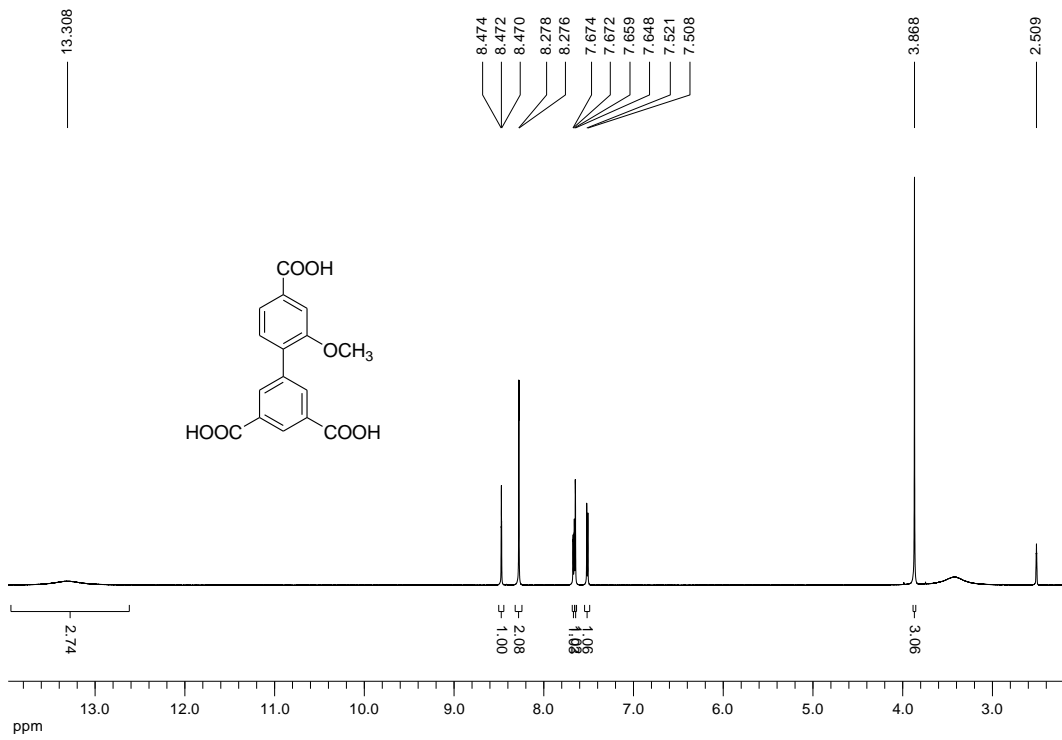

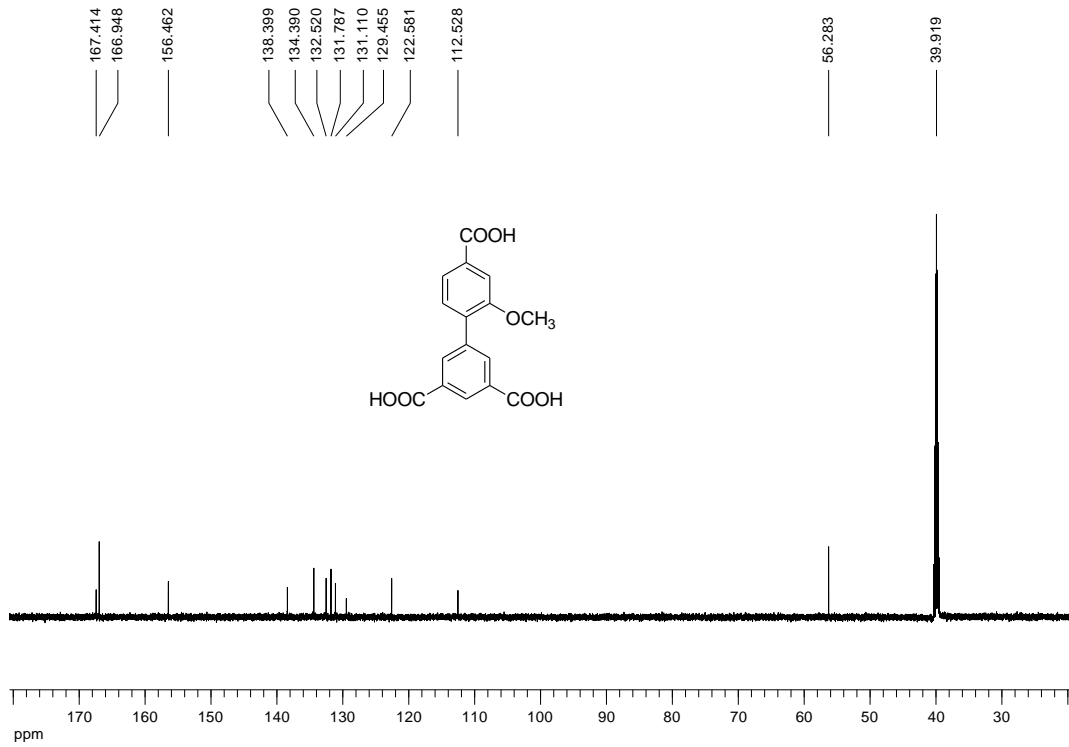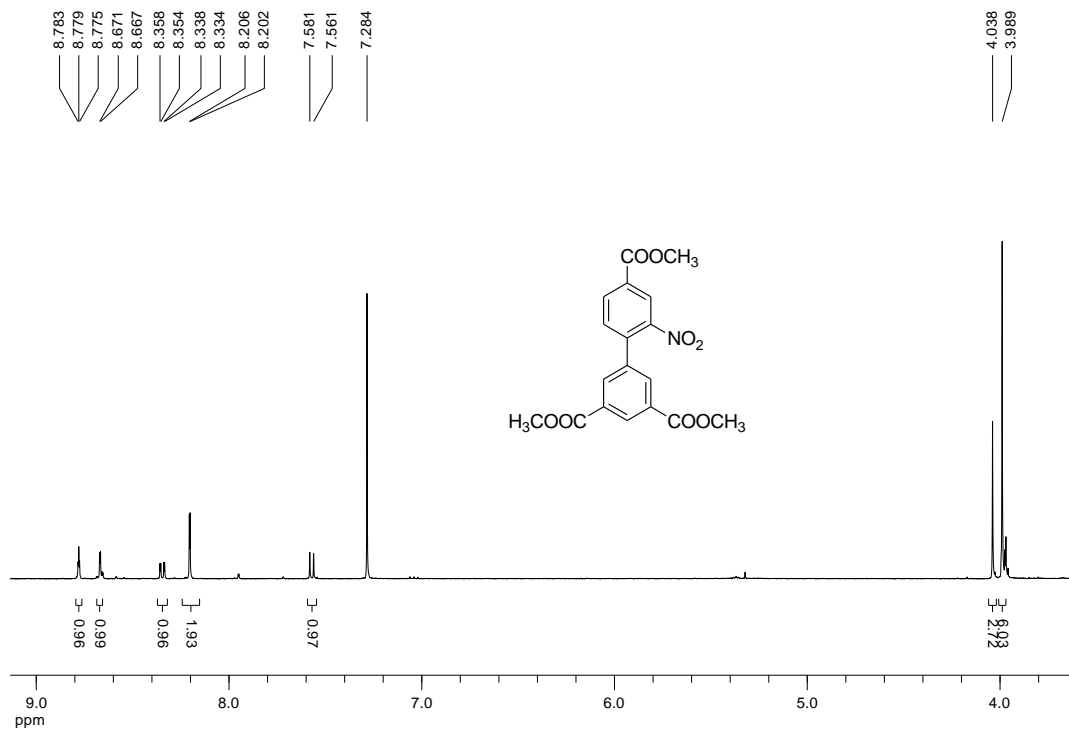

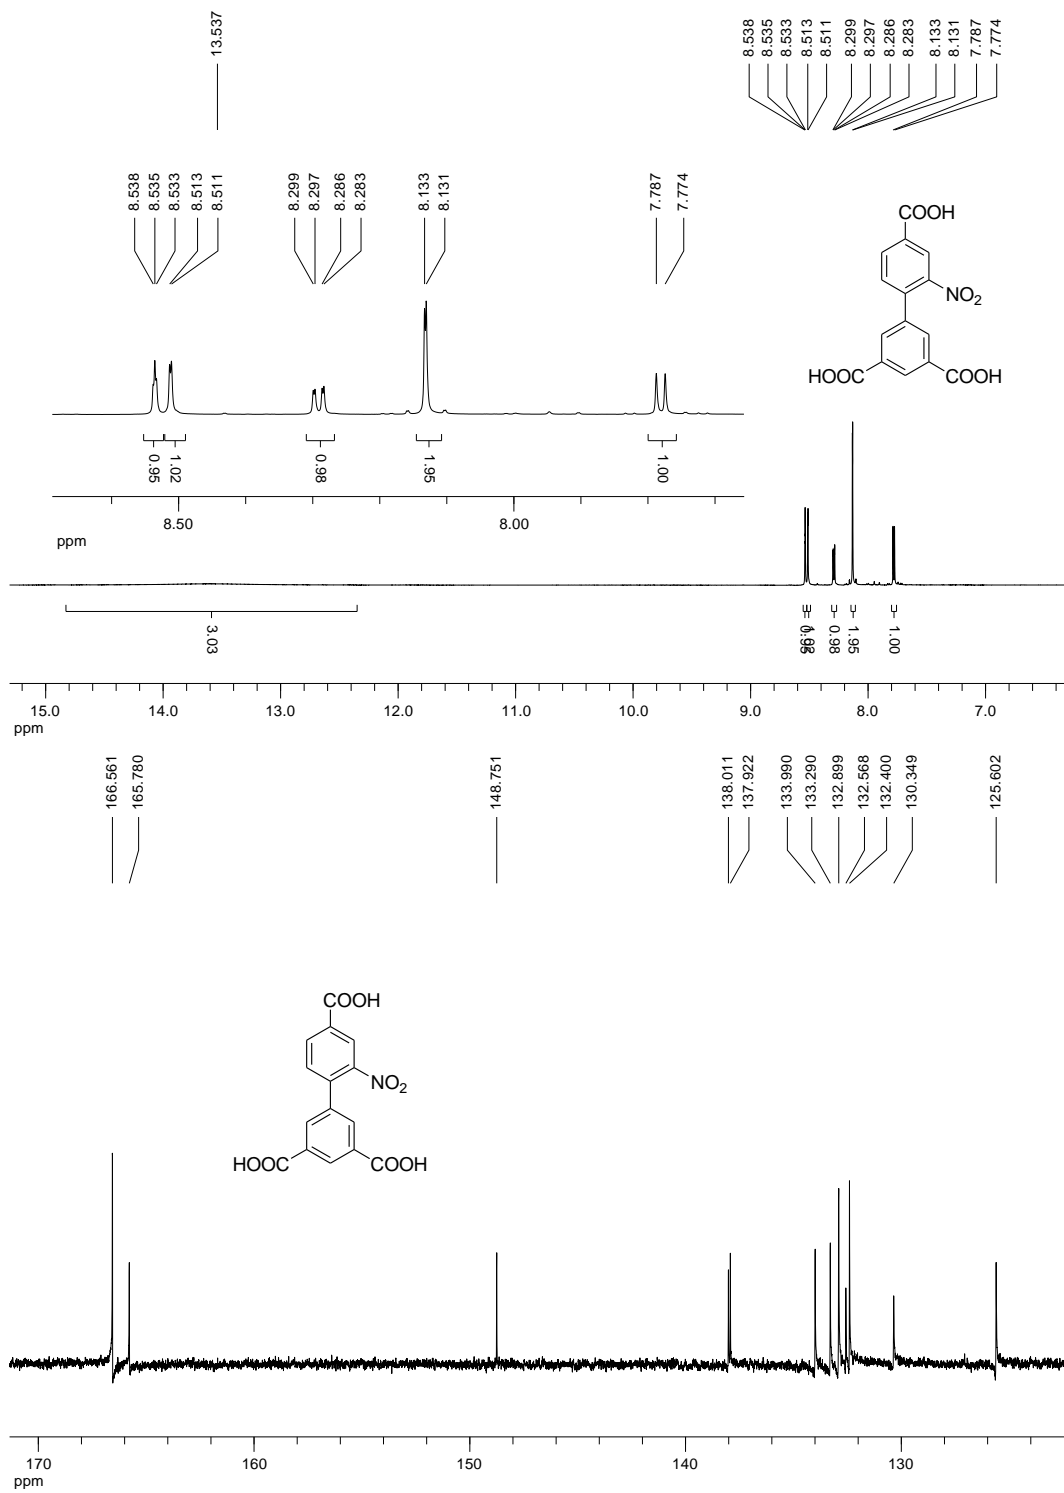

**Fig. S12** <sup>1</sup>H and <sup>13</sup>C NMR spectra.

**Table S1.** Summarizes of physical parameters of C<sub>2</sub>H<sub>2</sub>, CO<sub>2</sub>, and CH<sub>4</sub>

| Adsorbates                    | BP<br>(K) | $T_c$<br>(K) | $p_c$<br>(bar) | Kinetic<br>diameter<br>(Å) | Molecular<br>dimension<br>(Å) | Polarizability<br>( $\times 10^{25}$ cm <sup>3</sup> ) | Dipole moment<br>( $\times 10^{18}$ esu cm) | Quadruple<br>moment<br>( $\times 10^{26}$ esu cm <sup>2</sup> ) |
|-------------------------------|-----------|--------------|----------------|----------------------------|-------------------------------|--------------------------------------------------------|---------------------------------------------|-----------------------------------------------------------------|
| C <sub>2</sub> H <sub>2</sub> | 188.40    | 308.30       | 61.14          | 3.3                        | 3.3×3.3×5.7                   | 33.3-39.3                                              | 0                                           | +7.5                                                            |
| CO <sub>2</sub>               | 216.55    | 304.12       | 73.74          | 3.3                        | 3.2×3.3×5.4                   | 29.11                                                  | 0                                           | -4.3                                                            |
| CH <sub>4</sub>               | 111.66    | 190.56       | 45.99          | 3.758                      | 3.7×3.7×3.7                   | 25.93                                                  | 0                                           | 0                                                               |

BP: normal boiling point;  $T_c$ : critical temperature;  $p_c$ : critical pressure



**Table S2** Crystal data and structure refinement for **ZJNU-109**, and **ZJNU-110**.

| MOFs                                                          | <b>ZJNU-109</b>                                                                                                                          | <b>ZJNU-110</b>                                                                                                                      |
|---------------------------------------------------------------|------------------------------------------------------------------------------------------------------------------------------------------|--------------------------------------------------------------------------------------------------------------------------------------|
| Empirical formula                                             | C <sub>84</sub> H <sub>122</sub> Cu <sub>5</sub> N <sub>12</sub> O <sub>39</sub>                                                         | C <sub>53</sub> H <sub>44</sub> Cu <sub>4</sub> N <sub>6</sub> O <sub>28</sub>                                                       |
| Formula weight                                                | 2241.63                                                                                                                                  | 1467.10                                                                                                                              |
| Temperature (K)                                               | 150(2)                                                                                                                                   | 150(2)                                                                                                                               |
| $\lambda$ (Å)                                                 | 1.54178                                                                                                                                  | 0.71073                                                                                                                              |
| Crystal system                                                | Monoclinic                                                                                                                               | Trigonal                                                                                                                             |
| Space group                                                   | <i>C2/c</i>                                                                                                                              | <i>R -3 m :H</i>                                                                                                                     |
| Unit cell dimensions                                          | $a = 32.031(6)$ Å<br>$b = 18.235(5)$ Å<br>$c = 41.925(10)$ Å<br>$\alpha = 90^\circ$<br>$\beta = 95.246(12)^\circ$<br>$\gamma = 90^\circ$ | $a = 18.3936(7)$ Å<br>$b = 18.3936(7)$ Å<br>$c = 36.5323(14)$ Å<br>$\alpha = 90^\circ$<br>$\beta = 90^\circ$<br>$\gamma = 120^\circ$ |
| $V$ (Å <sup>3</sup> )                                         | 24385(10)                                                                                                                                | 10703.9(9)                                                                                                                           |
| $Z$                                                           | 8                                                                                                                                        | 6                                                                                                                                    |
| $D_c$ (g cm <sup>-3</sup> )                                   | 1.221                                                                                                                                    | 1.366                                                                                                                                |
| $\mu$ (mm <sup>-1</sup> )                                     | 1.605                                                                                                                                    | 1.255                                                                                                                                |
| $F(000)$                                                      | 9336                                                                                                                                     | 4464                                                                                                                                 |
| Crystal size (mm)                                             | 0.270 × 0.210 × 0.090                                                                                                                    | 0.250 × 0.240 × 0.220                                                                                                                |
| $\theta$ range for data collection (°)                        | 2.116 to 68.409                                                                                                                          | 2.214 to 30.512                                                                                                                      |
| Limiting indices                                              | $-36 \leq h \leq 38$<br>$-21 \leq k \leq 21$<br>$-50 \leq l \leq 50$                                                                     | $-25 \leq h \leq 25$<br>$-24 \leq k \leq 25$<br>$-51 \leq l \leq 49$                                                                 |
| Reflections collected / unique                                | 120037 / 22189                                                                                                                           | 35345 / 3885                                                                                                                         |
| $R_{\text{int}}$                                              | 0.0937                                                                                                                                   | 0.0272                                                                                                                               |
| Max. and min. transmission                                    | 0.7531 and 0.5265                                                                                                                        | 0.2657 and 0.2075                                                                                                                    |
| Refinement method                                             | Full-matrix least-squares on $F^2$                                                                                                       | Full-matrix least-squares on $F^2$                                                                                                   |
| Data/restraints/parameters                                    | 22189 / 647 / 812                                                                                                                        | 3885 / 395 / 269                                                                                                                     |
| Goodness-of-fit on $F^2$                                      | 1.097                                                                                                                                    | 1.021                                                                                                                                |
| Final $R$ indices [ $I > 2\sigma(I)$ ]                        | $R_1 = 0.0940$<br>$wR_2 = 0.2337$                                                                                                        | $R_1 = 0.0768$<br>$wR_2 = 0.1767$                                                                                                    |
| $R$ indices (all data)                                        | $R_1 = 0.1177$<br>$wR_2 = 0.2487$                                                                                                        | $R_1 = 0.0896$<br>$wR_2 = 0.1837$                                                                                                    |
| Largest diff. peak and hole (e <sup>-</sup> Å <sup>-3</sup> ) | 2.084 and -1.329                                                                                                                         | 1.030 and -0.952                                                                                                                     |
| CCDC                                                          | 2035071                                                                                                                                  | 2035070                                                                                                                              |

**Table S3** Langmuir-Freundlich parameters for adsorption of C<sub>2</sub>H<sub>2</sub>, CO<sub>2</sub>, and CH<sub>4</sub> in **ZJNU-109**.

| Adsorbates                    | $q_{\text{sat}}$<br>(mmol g <sup>-1</sup> ) | $b_0$<br>(kPa) <sup>-<math>\nu</math></sup> | $E$<br>(kJ mol <sup>-1</sup> ) | $\nu$   | $R^2$   |
|-------------------------------|---------------------------------------------|---------------------------------------------|--------------------------------|---------|---------|
| C <sub>2</sub> H <sub>2</sub> | 19.01133                                    | 1.91495×10 <sup>-5</sup>                    | 16.559                         | 0.65755 | 0.99966 |
| CO <sub>2</sub>               | 12.90022                                    | 4.16121×10 <sup>-7</sup>                    | 21.495                         | 1       | 0.99996 |
| CH <sub>4</sub>               | 9.53946                                     | 1.53902×10 <sup>-6</sup>                    | 15.037                         | 1       | 0.99968 |

**Table S4** Langmuir-Freundlich parameters for adsorption of C<sub>2</sub>H<sub>2</sub>, CO<sub>2</sub>, and CH<sub>4</sub> in **ZJNU-110**.

| Adsorbates                    | $q_{\text{sat}}$<br>(mmol g <sup>-1</sup> ) | $b_0$<br>(kPa) <sup>-<math>\nu</math></sup> | $E$<br>(kJ mol <sup>-1</sup> ) | $\nu$   | $R^2$   |
|-------------------------------|---------------------------------------------|---------------------------------------------|--------------------------------|---------|---------|
| C <sub>2</sub> H <sub>2</sub> | 5.49258                                     | 5.87531×10 <sup>-7</sup>                    | 26.744                         | 0.90145 | 0.99979 |
| CO <sub>2</sub>               | 7.40873                                     | 1.33615×10 <sup>-6</sup>                    | 21.616                         | 0.92265 | 0.99996 |
| CH <sub>4</sub>               | 3.78056                                     | 1.64136×10 <sup>-6</sup>                    | 18.287                         | 1       | 0.99992 |

**Table S5** Summary of pore textural and gas adsorption properties of **ZJNU-109** and **ZJNU-110**.

| MOFs                                                                                   |       | ZJNU-109  | ZJNU-110 |
|----------------------------------------------------------------------------------------|-------|-----------|----------|
| $S_{\text{BET}}/S_{\text{Langmuir}}$ ( $\text{m}^2 \text{g}^{-1}$ )                    |       | 2081/2316 | 855/953  |
| $V_{\text{p}}$ ( $\text{cm}^3 \text{g}^{-1}$ )                                         |       | 0.8257    | 0.3403   |
| $\text{C}_2\text{H}_2$ uptake <sup>a</sup><br>( $\text{cm}^3 \text{g}^{-1}$ , STP)     | 298 K | 104.6     | 79.5     |
|                                                                                        | 288 K | 125.4     | 90.0     |
|                                                                                        | 278 K | 150.2     | 99.5     |
| $\text{CO}_2$ uptake <sup>a</sup><br>( $\text{cm}^3 \text{g}^{-1}$ , STP)              | 298 K | 60.0      | 63.2     |
|                                                                                        | 288 K | 75.4      | 75.6     |
|                                                                                        | 278 K | 94.9      | 88.6     |
| $\text{CH}_4$ uptake <sup>a</sup><br>( $\text{cm}^3 \text{g}^{-1}$ , STP)              | 298 K | 14.3      | 18.6     |
|                                                                                        | 288 K | 17.0      | 22.8     |
|                                                                                        | 278 K | 21.2      | 27.4     |
| $\text{C}_2\text{H}_2/\text{CH}_4$<br>( $v/v = 1/1$ )<br>IAST selectivity <sup>a</sup> | 298 K | 21.6      | 15.3     |
|                                                                                        | 288 K | 23.3      | 18.9     |
|                                                                                        | 278 K | 25.6      | 24.0     |
| $\text{C}_2\text{H}_2/\text{CO}_2$<br>( $v/v = 1/1$ )<br>IAST selectivity <sup>a</sup> | 298 K | 3.8       | 2.3      |
|                                                                                        | 288 K | 3.7       | 2.4      |
|                                                                                        | 278 K | 3.6       | 2.4      |

$S_{\text{BET}}/S_{\text{Langmuir}}$  = BET and Langmuir surface areas;  $V_{\text{p}}$  = total pore volume; <sup>a</sup> at 1 atm;

STP = standard temperature and pressure
